# Supplementary material for: Simulation-based optimization of genomic selection scheme for accelerating genetic gain while preventing inbreeding depression in onion breeding
Source: PubMed Central journal article supplement — Breed Sci. 2020 Nov 17;70(5):594–604. doi: 10.1270/jsbbs.20047 (PMC7878936; doi:10.1270/jsbbs.20047), 2020-11-17
Supplement: 70_594_s2.pdf [file 70_594_s2.pdf]

**Supplemental Table 1. Summary of simulation results in 5 and 10 years, with the setting of 200 n and 100 QTLs**

The columns "No" indicate the numbers in which the marker genotypes of breeding population were completely fixed in 100 simulation replications. The values in brackets indicate the standard deviation. The underlined values in columns "Genetic gain" and "Genetic variance" indicate the maximum values, while those in column "Inbreeding coefficient" indicate the minimum values in each column.

| Scheme | Maker | $h^2 = 0.3$ |                     |                     |                        |         |                     |                     |                        | $h^2 = 0.6$ |                     |                     |                        |         |                     |                     |                        |
|--------|-------|-------------|---------------------|---------------------|------------------------|---------|---------------------|---------------------|------------------------|-------------|---------------------|---------------------|------------------------|---------|---------------------|---------------------|------------------------|
|        |       | 5 year      |                     |                     |                        | 10 year |                     |                     |                        | 5 year      |                     |                     |                        | 10 year |                     |                     |                        |
|        |       | No          | Genetic gain        | Genetic variance    | Inbreeding coefficient | No      | Genetic gain        | Genetic variance    | Inbreeding coefficient | No          | Genetic gain        | Genetic variance    | Inbreeding coefficient | No      | Genetic gain        | Genetic variance    | Inbreeding coefficient |
| GPS    | -     | 0           | 2.9<br>(0.5)        | 0.5<br>(0.2)        | <u>0.4</u><br>(0.1)    | 0       | 4.0<br>(0.7)        | 0.4<br>(0.2)        | 0.5<br>(0.1)           | 0           | 3.6<br>(0.5)        | 0.4<br>(0.2)        | 0.4<br>(0.1)           | 0       | 4.9<br>(0.7)        | 0.3<br>(0.1)        | 0.6<br>(0.1)           |
| SPS    | -     | 0           | 3.1<br>(0.7)        | 0.5<br>(0.3)        | 0.9<br>(0.0)           | 0       | 3.9<br>(0.7)        | 0.2<br>(0.1)        | 1.0<br>(0.0)           | 0           | 3.8<br>(0.6)        | 0.3<br>(0.1)        | 0.9<br>(0.0)           | 0       | 4.7<br>(0.8)        | 0.1<br>(0.1)        | 1.0<br>(0.0)           |
| GGS    | 500   | 0           | 3.6<br>(0.5)        | 0.3<br>(0.2)        | 0.6<br>(0.1)           | 0       | 4.8<br>(0.7)        | 0.2<br>(0.1)        | 0.8<br>(0.1)           | 0           | 4.0<br>(0.5)        | 0.2<br>(0.1)        | 0.5<br>(0.1)           | 0       | 5.3<br>(0.7)        | 0.1<br>(0.1)        | 0.8<br>(0.1)           |
| GGS    | 200   | 0           | 3.7<br>(0.4)        | 0.3<br>(0.2)        | 0.6<br>(0.1)           | 0       | 4.8<br>(0.7)        | 0.1<br>(0.1)        | 0.8<br>(0.1)           | 0           | 4.0<br>(0.5)        | 0.3<br>(0.1)        | 0.6<br>(0.1)           | 0       | 5.3<br>(0.7)        | 0.1<br>(0.1)        | 0.8<br>(0.1)           |
| GGS    | 100   | 0           | 3.5<br>(0.5)        | 0.3<br>(0.1)        | 0.6<br>(0.1)           | 1       | 4.5<br>(0.7)        | 0.2<br>(0.1)        | 0.8<br>(0.1)           | 0           | 3.8<br>(0.5)        | 0.3<br>(0.1)        | 0.6<br>(0.1)           | 1       | 5.0<br>(0.7)        | 0.1<br>(0.1)        | 0.8<br>(0.1)           |
| IGS    | 500   | 0           | 3.0<br>(0.4)        | 0.5<br>(0.2)        | 0.4<br>(0.0)           | 0       | 4.1<br>(0.6)        | 0.4<br>(0.2)        | 0.5<br>(0.0)           | 0           | 3.4<br>(0.4)        | 0.4<br>(0.1)        | 0.4<br>(0.0)           | 0       | 4.7<br>(0.6)        | 0.3<br>(0.1)        | 0.5<br>(0.1)           |
| IGS    | 200   | 0           | 3.0<br>(0.4)        | 0.6<br>(0.2)        | 0.4<br>(0.0)           | 0       | 4.1<br>(0.6)        | 0.4<br>(0.2)        | 0.5<br>(0.0)           | 0           | 3.4<br>(0.4)        | 0.5<br>(0.2)        | <u>0.4</u><br>(0.0)    | 0       | 4.7<br>(0.6)        | 0.3<br>(0.1)        | <u>0.5</u><br>(0.1)    |
| IGS    | 100   | 0           | 2.9<br>(0.4)        | <u>0.6</u><br>(0.2) | 0.4<br>(0.0)           | 0       | 3.9<br>(0.6)        | <u>0.4</u><br>(0.2) | <u>0.5</u><br>(0.1)    | 0           | 3.3<br>(0.5)        | <u>0.5</u><br>(0.1) | 0.4<br>(0.0)           | 0       | 4.5<br>(0.6)        | <u>0.3</u><br>(0.1) | 0.5<br>(0.1)           |
| GGS_S  | 500   | 0           | <u>4.0</u><br>(0.6) | 0.3<br>(0.1)        | 0.7<br>(0.1)           | 0       | 4.7<br>(0.9)        | 0.1<br>(0.1)        | 0.9<br>(0.0)           | 0           | <u>4.7</u><br>(0.6) | 0.2<br>(0.1)        | 0.7<br>(0.1)           | 0       | 5.6<br>(0.9)        | 0.1<br>(0.1)        | 0.9<br>(0.0)           |
| GGS_S  | 200   | 0           | 3.8<br>(0.6)        | 0.3<br>(0.2)        | 0.7<br>(0.1)           | 1       | 4.5<br>(0.9)        | 0.1<br>(0.1)        | 0.9<br>(0.0)           | 0           | 4.5<br>(0.6)        | 0.2<br>(0.1)        | 0.7<br>(0.1)           | 0       | 5.3<br>(0.9)        | 0.1<br>(0.1)        | 0.9<br>(0.0)           |
| GGS_S  | 100   | 0           | 3.6<br>(0.7)        | 0.3<br>(0.2)        | 0.7<br>(0.1)           | 9       | 4.2<br>(0.8)        | 0.1<br>(0.1)        | 0.9<br>(0.0)           | 0           | 4.1<br>(0.6)        | 0.3<br>(0.2)        | 0.7<br>(0.1)           | 0       | 4.7<br>(0.9)        | 0.1<br>(0.1)        | 0.9<br>(0.0)           |
| IGS_S  | 500   | 0           | 3.7<br>(0.5)        | 0.4<br>(0.2)        | 0.6<br>(0.0)           | 0       | 4.6<br>(0.8)        | 0.2<br>(0.1)        | 0.8<br>(0.0)           | 0           | 4.3<br>(0.6)        | 0.3<br>(0.2)        | 0.6<br>(0.0)           | 0       | 5.4<br>(0.9)        | 0.2<br>(0.1)        | 0.8<br>(0.0)           |
| IGS_S  | 200   | 0           | 3.6<br>(0.5)        | 0.4<br>(0.2)        | 0.6<br>(0.0)           | 0       | 4.4<br>(0.8)        | 0.2<br>(0.1)        | 0.8<br>(0.0)           | 0           | 4.2<br>(0.6)        | 0.3<br>(0.2)        | 0.6<br>(0.0)           | 0       | 5.1<br>(0.8)        | 0.2<br>(0.1)        | 0.8<br>(0.0)           |
| IGS_S  | 100   | 0           | 3.4<br>(0.6)        | 0.4<br>(0.2)        | 0.6<br>(0.0)           | 0       | 4.0<br>(0.8)        | 0.3<br>(0.1)        | 0.8<br>(0.0)           | 0           | 3.8<br>(0.5)        | 0.4<br>(0.2)        | 0.6<br>(0.0)           | 0       | 4.6<br>(0.8)        | 0.3<br>(0.2)        | 0.8<br>(0.0)           |
| GGS_SU | 500   | 0           | 4.0<br>(0.6)        | 0.2<br>(0.1)        | 0.7<br>(0.1)           | 0       | <u>5.1</u><br>(0.9) | 0.1<br>(0.1)        | 0.9<br>(0.1)           | 0           | 4.4<br>(0.6)        | 0.2<br>(0.1)        | 0.6<br>(0.1)           | 0       | <u>5.8</u><br>(0.9) | 0.1<br>(0.0)        | 0.9<br>(0.1)           |
| GGS_SU | 200   | 0           | 3.8<br>(0.6)        | 0.3<br>(0.2)        | 0.7<br>(0.1)           | 3       | 4.9<br>(0.8)        | 0.1<br>(0.1)        | 0.9<br>(0.1)           | 0           | 4.3<br>(0.6)        | 0.2<br>(0.1)        | 0.7<br>(0.1)           | 0       | 5.7<br>(0.9)        | 0.1<br>(0.0)        | 0.9<br>(0.1)           |
| GGS_SU | 100   | 0           | 3.6<br>(0.6)        | 0.3<br>(0.2)        | 0.7<br>(0.1)           | 7       | 4.8<br>(0.8)        | 0.1<br>(0.1)        | 0.9<br>(0.1)           | 0           | 4.1<br>(0.5)        | 0.3<br>(0.1)        | 0.6<br>(0.1)           | 4       | 5.3<br>(0.8)        | 0.1<br>(0.1)        | 0.9<br>(0.1)           |
| IGS_SU | 500   | 0           | 3.3<br>(0.5)        | 0.5<br>(0.2)        | 0.5<br>(0.0)           | 0       | 4.6<br>(0.7)        | 0.3<br>(0.1)        | 0.6<br>(0.1)           | 0           | 3.9<br>(0.5)        | 0.4<br>(0.2)        | 0.5<br>(0.0)           | 0       | 5.4<br>(0.8)        | 0.2<br>(0.1)        | 0.6<br>(0.1)           |
| IGS_SU | 200   | 0           | 3.4<br>(0.5)        | 0.5<br>(0.2)        | 0.5<br>(0.1)           | 0       | 4.6<br>(0.8)        | 0.3<br>(0.1)        | 0.6<br>(0.1)           | 0           | 3.8<br>(0.5)        | 0.4<br>(0.2)        | 0.5<br>(0.0)           | 0       | 5.2<br>(0.8)        | 0.2<br>(0.1)        | 0.6<br>(0.1)           |
| IGS_SU | 100   | 0           | 3.2<br>(0.5)        | 0.5<br>(0.2)        | 0.5<br>(0.1)           | 0       | 4.3<br>(0.8)        | 0.3<br>(0.1)        | 0.6<br>(0.1)           | 0           | 3.7<br>(0.5)        | 0.4<br>(0.2)        | 0.5<br>(0.1)           | 0       | 5.0<br>(0.7)        | 0.2<br>(0.1)        | 0.6<br>(0.1)           |

**Supplemental Table 2. Summary of simulation results in 5 and 10 years, with the setting of 200 n and 30 QTLs**

The columns "No" indicate the numbers in which the marker genotypes of breeding population were completely fixed in 100 simulation replications. The values in brackets indicate the standard deviation. The underlined values in columns "Genetic gain" and "Genetic variance" indicate the maximum values, while those in column "Inbreeding coefficient" indicate the minimum values in each column.

| Scheme | Maker | $h^2 = 0.3$ |                     |                     |                        |    |                     |                     |                        |    | $h^2 = 0.6$         |                     |                        |    |                     |                     |                        |  |  |
|--------|-------|-------------|---------------------|---------------------|------------------------|----|---------------------|---------------------|------------------------|----|---------------------|---------------------|------------------------|----|---------------------|---------------------|------------------------|--|--|
|        |       | 5 year      |                     |                     | 10 year                |    |                     | 5 year              |                        |    | 10 year             |                     |                        |    |                     |                     |                        |  |  |
|        |       | No          | Genetic gain        | Genetic variance    | Inbreeding coefficient | No | Genetic gain        | Genetic variance    | Inbreeding coefficient | No | Genetic gain        | Genetic variance    | Inbreeding coefficient | No | Genetic gain        | Genetic variance    | Inbreeding coefficient |  |  |
| GPS    | -     | 0           | 2.7<br>(0.4)        | 0.5<br>(0.2)        | <u>0.4</u><br>(0.1)    | 0  | 3.7<br>(0.5)        | 0.3<br>(0.1)        | <u>0.5</u><br>(0.1)    | 0  | 3.4<br>(0.4)        | 0.3<br>(0.1)        | 0.4<br>(0.1)           | 0  | 4.4<br>(0.5)        | 0.1<br>(0.1)        | 0.6<br>(0.1)           |  |  |
| SPS    | -     | 0           | 3.0<br>(0.5)        | 0.4<br>(0.2)        | 0.9<br>(0.0)           | 0  | 3.6<br>(0.5)        | 0.1<br>(0.1)        | 1.0<br>(0.0)           | 0  | 3.5<br>(0.5)        | 0.2<br>(0.2)        | 0.9<br>(0.0)           | 0  | 4.2<br>(0.6)        | 0.1<br>(0.1)        | 1.0<br>(0.0)           |  |  |
| GGS    | 500   | 0           | 3.5<br>(0.4)        | 0.2<br>(0.1)        | 0.6<br>(0.1)           | 0  | 4.2<br>(0.6)        | 0.1<br>(0.1)        | 0.8<br>(0.1)           | 0  | 3.8<br>(0.4)        | 0.2<br>(0.1)        | 0.6<br>(0.1)           | 0  | 4.6<br>(0.6)        | 0.1<br>(0.1)        | 0.8<br>(0.1)           |  |  |
| GGS    | 200   | 0           | 3.4<br>(0.6)        | 0.2<br>(0.2)        | 0.6<br>(0.1)           | 0  | 4.2<br>(0.7)        | 0.1<br>(0.1)        | 0.8<br>(0.1)           | 0  | 3.7<br>(0.4)        | 0.2<br>(0.1)        | 0.6<br>(0.1)           | 0  | 4.6<br>(0.5)        | 0.1<br>(0.0)        | 0.8<br>(0.1)           |  |  |
| GGS    | 100   | 0           | 3.3<br>(0.5)        | 0.2<br>(0.1)        | 0.6<br>(0.1)           | 1  | 4.2<br>(0.7)        | 0.1<br>(0.1)        | 0.8<br>(0.1)           | 0  | 3.6<br>(0.4)        | 0.2<br>(0.1)        | 0.6<br>(0.1)           | 0  | 4.5<br>(0.6)        | 0.1<br>(0.1)        | 0.8<br>(0.1)           |  |  |
| IGS    | 500   | 0           | 2.9<br>(0.4)        | 0.5<br>(0.2)        | 0.4<br>(0.0)           | 0  | 3.7<br>(0.5)        | 0.3<br>(0.1)        | 0.5<br>(0.1)           | 0  | 3.3<br>(0.3)        | 0.3<br>(0.1)        | 0.4<br>(0.0)           | 0  | 4.2<br>(0.4)        | 0.2<br>(0.1)        | 0.5<br>(0.1)           |  |  |
| IGS    | 200   | 0           | 2.8<br>(0.4)        | <u>0.5</u><br>(0.2) | 0.4<br>(0.0)           | 0  | 3.7<br>(0.6)        | 0.3<br>(0.1)        | 0.5<br>(0.1)           | 0  | 3.3<br>(0.3)        | 0.4<br>(0.1)        | 0.4<br>(0.0)           | 0  | 4.2<br>(0.5)        | 0.2<br>(0.1)        | 0.5<br>(0.0)           |  |  |
| IGS    | 100   | 0           | 2.8<br>(0.4)        | 0.5<br>(0.2)        | 0.4<br>(0.0)           | 0  | 3.6<br>(0.5)        | <u>0.3</u><br>(0.2) | 0.5<br>(0.1)           | 0  | 3.1<br>(0.3)        | <u>0.4</u><br>(0.1) | <u>0.4</u><br>(0.0)    | 0  | 4.1<br>(0.5)        | <u>0.2</u><br>(0.1) | <u>0.5</u><br>(0.1)    |  |  |
| GGS_S  | 500   | 0           | <u>3.6</u><br>(0.6) | 0.2<br>(0.1)        | 0.7<br>(0.1)           | 0  | 4.1<br>(0.7)        | 0.1<br>(0.1)        | 0.9<br>(0.0)           | 0  | <u>4.2</u><br>(0.5) | 0.2<br>(0.1)        | 0.7<br>(0.1)           | 0  | 4.7<br>(0.7)        | 0.1<br>(0.1)        | 0.9<br>(0.0)           |  |  |
| GGS_S  | 200   | 0           | 3.5<br>(0.6)        | 0.2<br>(0.2)        | 0.7<br>(0.1)           | 0  | 3.8<br>(0.7)        | 0.1<br>(0.1)        | 0.9<br>(0.0)           | 0  | 4.1<br>(0.6)        | 0.2<br>(0.1)        | 0.7<br>(0.1)           | 0  | 4.5<br>(0.7)        | 0.1<br>(0.1)        | 0.9<br>(0.0)           |  |  |
| GGS_S  | 100   | 0           | 3.3<br>(0.6)        | 0.2<br>(0.1)        | 0.7<br>(0.1)           | 2  | 3.6<br>(0.7)        | 0.1<br>(0.1)        | 0.9<br>(0.0)           | 0  | 3.8<br>(0.6)        | 0.2<br>(0.1)        | 0.7<br>(0.1)           | 0  | 4.1<br>(0.8)        | 0.1<br>(0.1)        | 0.9<br>(0.0)           |  |  |
| IGS_S  | 500   | 0           | 3.4<br>(0.5)        | 0.3<br>(0.1)        | 0.6<br>(0.1)           | 0  | 4.0<br>(0.6)        | 0.1<br>(0.1)        | 0.8<br>(0.0)           | 0  | 3.9<br>(0.5)        | 0.2<br>(0.1)        | 0.5<br>(0.1)           | 0  | 4.7<br>(0.7)        | 0.1<br>(0.1)        | 0.8<br>(0.0)           |  |  |
| IGS_S  | 200   | 0           | 3.3<br>(0.5)        | 0.3<br>(0.1)        | 0.6<br>(0.0)           | 0  | 3.7<br>(0.7)        | 0.1<br>(0.2)        | 0.8<br>(0.0)           | 0  | 3.8<br>(0.5)        | 0.2<br>(0.1)        | 0.5<br>(0.0)           | 0  | 4.4<br>(0.7)        | 0.1<br>(0.1)        | 0.8<br>(0.0)           |  |  |
| IGS_S  | 100   | 0           | 3.1<br>(0.5)        | 0.4<br>(0.2)        | 0.6<br>(0.0)           | 0  | 3.5<br>(0.7)        | 0.2<br>(0.2)        | 0.8<br>(0.0)           | 0  | 3.6<br>(0.5)        | 0.3<br>(0.2)        | 0.5<br>(0.1)           | 0  | 4.0<br>(0.7)        | 0.2<br>(0.1)        | 0.8<br>(0.0)           |  |  |
| GGS_SU | 500   | 0           | 3.6<br>(0.5)        | 0.2<br>(0.1)        | 0.7<br>(0.1)           | 4  | 4.3<br>(0.7)        | 0.0<br>(0.1)        | 0.9<br>(0.1)           | 0  | 4.1<br>(0.5)        | 0.2<br>(0.1)        | 0.6<br>(0.1)           | 1  | <u>4.9</u><br>(0.7) | 0.0<br>(0.0)        | 0.9<br>(0.1)           |  |  |
| GGS_SU | 200   | 0           | 3.6<br>(0.6)        | 0.2<br>(0.1)        | 0.7<br>(0.1)           | 1  | <u>4.3</u><br>(0.7) | 0.0<br>(0.0)        | 0.9<br>(0.1)           | 0  | 4.0<br>(0.5)        | 0.2<br>(0.1)        | 0.6<br>(0.1)           | 1  | 4.8<br>(0.7)        | 0.0<br>(0.0)        | 0.8<br>(0.1)           |  |  |
| GGS_SU | 100   | 0           | 3.5<br>(0.6)        | 0.2<br>(0.1)        | 0.7<br>(0.1)           | 5  | 4.2<br>(0.7)        | 0.0<br>(0.1)        | 0.9<br>(0.1)           | 0  | 3.8<br>(0.5)        | 0.2<br>(0.1)        | 0.6<br>(0.1)           | 0  | 4.7<br>(0.7)        | 0.0<br>(0.0)        | 0.9<br>(0.1)           |  |  |
| IGS_SU | 500   | 0           | 3.2<br>(0.5)        | 0.4<br>(0.2)        | 0.5<br>(0.0)           | 0  | 4.1<br>(0.6)        | 0.2<br>(0.2)        | 0.6<br>(0.1)           | 0  | 3.7<br>(0.4)        | 0.3<br>(0.1)        | 0.5<br>(0.1)           | 0  | 4.7<br>(0.6)        | 0.1<br>(0.1)        | 0.6<br>(0.1)           |  |  |
| IGS_SU | 200   | 0           | 3.1<br>(0.5)        | 0.4<br>(0.2)        | 0.5<br>(0.0)           | 0  | 4.0<br>(0.6)        | 0.2<br>(0.1)        | 0.6<br>(0.0)           | 0  | 3.6<br>(0.4)        | 0.3<br>(0.1)        | 0.5<br>(0.0)           | 0  | 4.6<br>(0.6)        | 0.1<br>(0.1)        | 0.6<br>(0.0)           |  |  |
| IGS_SU | 100   | 0           | 3.1<br>(0.4)        | 0.4<br>(0.2)        | 0.5<br>(0.0)           | 0  | 3.9<br>(0.6)        | 0.2<br>(0.1)        | 0.6<br>(0.1)           | 0  | 3.5<br>(0.4)        | 0.3<br>(0.1)        | 0.5<br>(0.0)           | 0  | 4.4<br>(0.6)        | 0.1<br>(0.1)        | 0.6<br>(0.1)           |  |  |

**Supplemental Table 3. Summary of simulation results in 5 and 10 years, with the setting of 500 n and 100 QTLs**

The columns "No" indicate the numbers in which the marker genotypes of breeding population were completely fixed in 100 simulation replications. The values in brackets indicate the standard deviation. The underlined values in columns "Genetic gain" and "Genetic variance" indicate the maximum values, while those in column "Inbreeding coefficient" indicate the minimum values in each column.

| Scheme | Maker | $h^2 = 0.3$ |                     |                     |                        |         |                     |                     |                        | $h^2 = 0.6$ |                     |                     |                        |         |                     |                     |                        |
|--------|-------|-------------|---------------------|---------------------|------------------------|---------|---------------------|---------------------|------------------------|-------------|---------------------|---------------------|------------------------|---------|---------------------|---------------------|------------------------|
|        |       | 5 year      |                     |                     |                        | 10 year |                     |                     |                        | 5 year      |                     |                     |                        | 10 year |                     |                     |                        |
|        |       | No          | Genetic gain        | Genetic variance    | Inbreeding coefficient | No      | Genetic gain        | Genetic variance    | Inbreeding coefficient | No          | Genetic gain        | Genetic variance    | Inbreeding coefficient | No      | Genetic gain        | Genetic variance    | Inbreeding coefficient |
| GPS    | -     | 0           | 3.1<br>(0.5)        | <u>0.5</u><br>(0.2) | <u>0.4</u><br>(0.1)    | 0       | 4.4<br>(0.7)        | <u>0.3</u><br>(0.1) | <u>0.5</u><br>(0.1)    | 0           | 4.1<br>(0.5)        | 0.3<br>(0.1)        | 0.5<br>(0.1)           | 0       | 5.4<br>(0.7)        | 0.2<br>(0.1)        | 0.6<br>(0.1)           |
| SPS    | -     | 0           | 3.4<br>(0.6)        | 0.4<br>(0.2)        | 0.9<br>(0.0)           | 0       | 4.2<br>(0.7)        | 0.2<br>(0.1)        | 1.0<br>(0.0)           | 0           | 4.2<br>(0.5)        | 0.3<br>(0.1)        | 0.9<br>(0.0)           | 0       | 5.1<br>(0.6)        | 0.1<br>(0.1)        | 1.0<br>(0.0)           |
| GGS    | 500   | 0           | 4.3<br>(0.5)        | 0.2<br>(0.1)        | 0.7<br>(0.1)           | 3       | 5.5<br>(0.7)        | 0.1<br>(0.1)        | 0.9<br>(0.1)           | 0           | 4.7<br>(0.4)        | 0.2<br>(0.1)        | 0.6<br>(0.1)           | 0       | 6.1<br>(0.8)        | 0.1<br>(0.1)        | 0.8<br>(0.1)           |
| GGS    | 200   | 0           | 4.2<br>(0.5)        | 0.2<br>(0.1)        | 0.7<br>(0.1)           | 1       | 5.3<br>(0.7)        | 0.1<br>(0.1)        | 0.9<br>(0.1)           | 0           | 4.6<br>(0.4)        | 0.2<br>(0.1)        | 0.6<br>(0.1)           | 0       | 6.0<br>(0.7)        | 0.1<br>(0.1)        | 0.8<br>(0.1)           |
| GGS    | 100   | 0           | 4.1<br>(0.5)        | 0.2<br>(0.1)        | 0.6<br>(0.1)           | 3       | 5.3<br>(0.7)        | 0.1<br>(0.1)        | 0.8<br>(0.1)           | 0           | 4.5<br>(0.4)        | 0.2<br>(0.1)        | 0.6<br>(0.1)           | 0       | 5.8<br>(0.7)        | 0.1<br>(0.1)        | 0.8<br>(0.1)           |
| IGS    | 500   | 0           | 3.8<br>(0.4)        | 0.4<br>(0.1)        | 0.4<br>(0.0)           | 0       | 5.0<br>(0.6)        | 0.2<br>(0.1)        | 0.6<br>(0.1)           | 0           | 4.2<br>(0.4)        | 0.3<br>(0.1)        | 0.4<br>(0.0)           | 0       | 5.7<br>(0.6)        | 0.2<br>(0.1)        | 0.6<br>(0.1)           |
| IGS    | 200   | 0           | 3.7<br>(0.4)        | 0.4<br>(0.2)        | 0.4<br>(0.0)           | 0       | 4.9<br>(0.6)        | 0.3<br>(0.1)        | 0.6<br>(0.1)           | 0           | 4.1<br>(0.4)        | 0.3<br>(0.1)        | <u>0.4</u><br>(0.0)    | 0       | 5.5<br>(0.6)        | 0.2<br>(0.1)        | <u>0.6</u><br>(0.1)    |
| IGS    | 100   | 0           | 3.6<br>(0.4)        | 0.4<br>(0.1)        | 0.4<br>(0.0)           | 0       | 4.8<br>(0.5)        | 0.3<br>(0.1)        | 0.6<br>(0.1)           | 0           | 4.0<br>(0.4)        | <u>0.4</u><br>(0.2) | 0.4<br>(0.0)           | 0       | 5.3<br>(0.6)        | <u>0.2</u><br>(0.1) | 0.6<br>(0.0)           |
| GGS_S  | 500   | 0           | <u>4.9</u><br>(0.6) | 0.2<br>(0.1)        | 0.8<br>(0.1)           | 1       | 5.7<br>(0.9)        | 0.1<br>(0.0)        | 0.9<br>(0.0)           | 0           | <u>5.6</u><br>(0.6) | 0.2<br>(0.1)        | 0.7<br>(0.1)           | 2       | 6.5<br>(1.0)        | 0.0<br>(0.0)        | 0.9<br>(0.0)           |
| GGS_S  | 200   | 0           | 4.6<br>(0.6)        | 0.2<br>(0.1)        | 0.8<br>(0.1)           | 3       | 5.3<br>(0.8)        | 0.1<br>(0.1)        | 0.9<br>(0.0)           | 0           | 5.3<br>(0.7)        | 0.2<br>(0.1)        | 0.7<br>(0.1)           | 3       | 6.1<br>(1.1)        | 0.1<br>(0.1)        | 0.9<br>(0.0)           |
| GGS_S  | 100   | 0           | 4.3<br>(0.7)        | 0.2<br>(0.1)        | 0.7<br>(0.1)           | 18      | 4.7<br>(0.9)        | 0.1<br>(0.1)        | 0.9<br>(0.0)           | 0           | 4.8<br>(0.6)        | 0.2<br>(0.1)        | 0.7<br>(0.1)           | 19      | 5.3<br>(0.9)        | 0.1<br>(0.1)        | 0.9<br>(0.0)           |
| IGS_S  | 500   | 0           | 4.6<br>(0.6)        | 0.2<br>(0.1)        | 0.6<br>(0.0)           | 0       | 5.6<br>(0.8)        | 0.1<br>(0.1)        | 0.9<br>(0.0)           | 0           | 5.4<br>(0.6)        | 0.2<br>(0.1)        | 0.6<br>(0.0)           | 0       | <u>6.6</u><br>(1.0) | 0.1<br>(0.1)        | 0.8<br>(0.0)           |
| IGS_S  | 200   | 0           | 4.5<br>(0.5)        | 0.3<br>(0.1)        | 0.6<br>(0.0)           | 0       | 5.3<br>(0.7)        | 0.1<br>(0.1)        | 0.8<br>(0.0)           | 0           | 5.1<br>(0.6)        | 0.2<br>(0.1)        | 0.6<br>(0.1)           | 0       | 6.1<br>(0.9)        | 0.1<br>(0.1)        | 0.8<br>(0.0)           |
| IGS_S  | 100   | 0           | 4.1<br>(0.6)        | 0.3<br>(0.2)        | 0.6<br>(0.1)           | 0       | 4.8<br>(0.8)        | 0.2<br>(0.1)        | 0.8<br>(0.0)           | 0           | 4.6<br>(0.5)        | 0.3<br>(0.2)        | 0.6<br>(0.1)           | 0       | 5.3<br>(0.9)        | 0.2<br>(0.1)        | 0.8<br>(0.0)           |
| GGS_SU | 500   | 0           | 4.7<br>(0.6)        | 0.2<br>(0.1)        | 0.7<br>(0.1)           | 0       | <u>5.9</u><br>(0.8) | 0.0<br>(0.0)        | 0.9<br>(0.1)           | 0           | 5.3<br>(0.6)        | 0.2<br>(0.1)        | 0.7<br>(0.1)           | 0       | 6.7<br>(0.9)        | 0.0<br>(0.0)        | 0.9<br>(0.1)           |
| GGS_SU | 200   | 0           | 4.5<br>(0.6)        | 0.2<br>(0.1)        | 0.7<br>(0.1)           | 0       | 5.7<br>(0.8)        | 0.1<br>(0.1)        | 0.9<br>(0.1)           | 0           | 5.1<br>(0.6)        | 0.2<br>(0.1)        | 0.7<br>(0.1)           | 0       | 6.5<br>(0.9)        | 0.0<br>(0.0)        | 0.9<br>(0.1)           |
| GGS_SU | 100   | 0           | 4.4<br>(0.5)        | 0.2<br>(0.1)        | 0.7<br>(0.1)           | 1       | 5.5<br>(0.7)        | 0.1<br>(0.1)        | 0.9<br>(0.1)           | 0           | 4.8<br>(0.6)        | 0.2<br>(0.1)        | 0.7<br>(0.1)           | 1       | 6.2<br>(0.9)        | 0.1<br>(0.0)        | 0.9<br>(0.1)           |
| IGS_SU | 500   | 0           | 4.3<br>(0.5)        | 0.3<br>(0.1)        | 0.6<br>(0.1)           | 0       | 5.7<br>(0.8)        | 0.2<br>(0.1)        | 0.7<br>(0.1)           | 0           | 4.9<br>(0.5)        | 0.3<br>(0.1)        | 0.5<br>(0.1)           | 0       | 6.5<br>(0.8)        | 0.1<br>(0.1)        | 0.7<br>(0.1)           |
| IGS_SU | 200   | 0           | 4.2<br>(0.5)        | 0.3<br>(0.1)        | 0.6<br>(0.1)           | 0       | 5.5<br>(0.6)        | 0.2<br>(0.1)        | 0.7<br>(0.1)           | 0           | 4.8<br>(0.5)        | 0.3<br>(0.1)        | 0.5<br>(0.1)           | 0       | 6.3<br>(0.8)        | 0.1<br>(0.1)        | 0.7<br>(0.1)           |
| IGS_SU | 100   | 0           | 4.0<br>(0.5)        | 0.4<br>(0.1)        | 0.5<br>(0.1)           | 0       | 5.2<br>(0.7)        | 0.2<br>(0.1)        | 0.7<br>(0.1)           | 0           | 4.4<br>(0.5)        | 0.3<br>(0.2)        | 0.5<br>(0.0)           | 0       | 5.8<br>(0.7)        | 0.2<br>(0.1)        | 0.7<br>(0.1)           |

**Supplemental Table 4. Summary of simulation results in 5 and 10 years, with the setting of 500 n and 30 QTLs**

The columns "No" indicate the numbers in which the marker genotypes of breeding population were completely fixed in 100 simulation replications. The values in brackets indicate the standard deviation. The underlined values in columns "Genetic gain" and "Genetic variance" indicate the maximum values, while those in column "Inbreeding coefficient" indicate the minimum values in each column.

| Scheme | Maker | $h^2 = 0.3$ |                     |                     |                        |         |                     |                     |                        | $h^2 = 0.6$ |                     |                     |                        |         |                     |                     |                        |
|--------|-------|-------------|---------------------|---------------------|------------------------|---------|---------------------|---------------------|------------------------|-------------|---------------------|---------------------|------------------------|---------|---------------------|---------------------|------------------------|
|        |       | 5 year      |                     |                     |                        | 10 year |                     |                     |                        | 5 year      |                     |                     |                        | 10 year |                     |                     |                        |
|        |       | No          | Genetic gain        | Genetic variance    | Inbreeding coefficient | No      | Genetic gain        | Genetic variance    | Inbreeding coefficient | No          | Genetic gain        | Genetic variance    | Inbreeding coefficient | No      | Genetic gain        | Genetic variance    | Inbreeding coefficient |
| GPS    | -     | 0           | 3.0<br>(0.5)        | <u>0.4</u><br>(0.2) | <u>0.4</u><br>(0.1)    | 0       | 4.1<br>(0.6)        | <u>0.2</u><br>(0.1) | <u>0.5</u><br>(0.1)    | 0           | 3.8<br>(0.5)        | 0.3<br>(0.1)        | 0.4<br>(0.1)           | 0       | 4.7<br>(0.8)        | 0.1<br>(0.1)        | 0.6<br>(0.1)           |
| SPS    | -     | 0           | 3.3<br>(0.5)        | 0.4<br>(0.3)        | 0.9<br>(0.0)           | 0       | 4.1<br>(0.6)        | 0.1<br>(0.1)        | 1.0<br>(0.0)           | 0           | 3.9<br>(0.6)        | 0.2<br>(0.1)        | 0.9<br>(0.0)           | 0       | 4.5<br>(0.7)        | 0.0<br>(0.0)        | 1.0<br>(0.0)           |
| GGS    | 500   | 0           | 4.1<br>(0.5)        | 0.1<br>(0.1)        | 0.7<br>(0.1)           | 1       | 4.8<br>(0.7)        | 0.0<br>(0.0)        | 0.9<br>(0.1)           | 0           | 4.3<br>(0.5)        | 0.1<br>(0.1)        | 0.6<br>(0.1)           | 0       | 5.1<br>(0.7)        | 0.0<br>(0.0)        | 0.8<br>(0.1)           |
| GGS    | 200   | 0           | 4.0<br>(0.5)        | 0.2<br>(0.1)        | 0.7<br>(0.1)           | 1       | 4.7<br>(0.7)        | 0.0<br>(0.0)        | 0.9<br>(0.1)           | 0           | 4.3<br>(0.5)        | 0.1<br>(0.1)        | 0.6<br>(0.1)           | 1       | 5.1<br>(0.8)        | 0.0<br>(0.0)        | 0.8<br>(0.1)           |
| GGS    | 100   | 0           | 3.9<br>(0.5)        | 0.1<br>(0.1)        | 0.7<br>(0.1)           | 5       | 4.6<br>(0.7)        | 0.0<br>(0.1)        | 0.9<br>(0.1)           | 0           | 4.2<br>(0.5)        | 0.1<br>(0.1)        | 0.6<br>(0.1)           | 1       | 4.9<br>(0.7)        | 0.0<br>(0.0)        | 0.8<br>(0.1)           |
| IGS    | 500   | 0           | 3.6<br>(0.4)        | 0.3<br>(0.1)        | 0.4<br>(0.0)           | 0       | 4.6<br>(0.6)        | 0.1<br>(0.1)        | 0.6<br>(0.1)           | 0           | 3.9<br>(0.5)        | 0.2<br>(0.1)        | 0.4<br>(0.0)           | 0       | 4.9<br>(0.7)        | 0.1<br>(0.0)        | 0.6<br>(0.1)           |
| IGS    | 200   | 0           | 3.5<br>(0.4)        | 0.3<br>(0.1)        | 0.4<br>(0.0)           | 0       | 4.5<br>(0.6)        | 0.2<br>(0.1)        | 0.6<br>(0.1)           | 0           | 3.9<br>(0.4)        | 0.2<br>(0.1)        | <u>0.4</u><br>(0.0)    | 0       | 4.8<br>(0.7)        | 0.1<br>(0.1)        | <u>0.6</u><br>(0.1)    |
| IGS    | 100   | 0           | 3.4<br>(0.5)        | 0.4<br>(0.1)        | 0.4<br>(0.0)           | 0       | 4.3<br>(0.7)        | 0.2<br>(0.1)        | 0.6<br>(0.1)           | 0           | 3.7<br>(0.4)        | <u>0.3</u><br>(0.1) | 0.4<br>(0.0)           | 0       | 4.6<br>(0.7)        | <u>0.1</u><br>(0.1) | 0.6<br>(0.1)           |
| GGS_S  | 500   | 0           | <u>4.4</u><br>(0.6) | 0.1<br>(0.1)        | 0.7<br>(0.1)           | 3       | 4.8<br>(0.9)        | 0.0<br>(0.0)        | 0.9<br>(0.0)           | 0           | <u>4.7</u><br>(0.7) | 0.1<br>(0.1)        | 0.7<br>(0.1)           | 1       | 5.0<br>(0.8)        | 0.0<br>(0.1)        | 0.9<br>(0.0)           |
| GGS_S  | 200   | 0           | 4.2<br>(0.7)        | 0.1<br>(0.1)        | 0.7<br>(0.1)           | 4       | 4.5<br>(0.8)        | 0.1<br>(0.1)        | 0.9<br>(0.0)           | 0           | 4.6<br>(0.7)        | 0.1<br>(0.1)        | 0.7<br>(0.1)           | 1       | 5.0<br>(0.8)        | 0.0<br>(0.0)        | 0.9<br>(0.0)           |
| GGS_S  | 100   | 0           | 3.9<br>(0.7)        | 0.2<br>(0.1)        | 0.7<br>(0.1)           | 19      | 4.1<br>(0.8)        | 0.1<br>(0.1)        | 0.9<br>(0.0)           | 0           | 4.2<br>(0.6)        | 0.1<br>(0.1)        | 0.7<br>(0.1)           | 19      | 4.3<br>(0.6)        | 0.1<br>(0.1)        | 0.9<br>(0.0)           |
| IGS_S  | 500   | 0           | 4.3<br>(0.6)        | 0.2<br>(0.1)        | 0.6<br>(0.1)           | 0       | 4.9<br>(0.8)        | 0.1<br>(0.1)        | 0.8<br>(0.0)           | 0           | 4.6<br>(0.7)        | 0.1<br>(0.1)        | 0.6<br>(0.0)           | 0       | 5.1<br>(0.8)        | 0.0<br>(0.0)        | 0.8<br>(0.0)           |
| IGS_S  | 200   | 0           | 4.1<br>(0.6)        | 0.2<br>(0.1)        | 0.6<br>(0.1)           | 0       | 4.6<br>(0.8)        | 0.1<br>(0.1)        | 0.8<br>(0.0)           | 0           | 4.4<br>(0.6)        | 0.2<br>(0.1)        | 0.6<br>(0.1)           | 0       | 4.9<br>(0.8)        | 0.1<br>(0.1)        | 0.8<br>(0.0)           |
| IGS_S  | 100   | 0           | 3.8<br>(0.5)        | 0.3<br>(0.1)        | 0.6<br>(0.0)           | 0       | 4.1<br>(0.7)        | 0.2<br>(0.1)        | 0.8<br>(0.0)           | 0           | 4.1<br>(0.6)        | 0.2<br>(0.1)        | 0.6<br>(0.0)           | 0       | 4.3<br>(0.7)        | 0.1<br>(0.1)        | 0.8<br>(0.0)           |
| GGS_SU | 500   | 0           | 4.3<br>(0.6)        | 0.1<br>(0.1)        | 0.7<br>(0.1)           | 0       | <u>5.0</u><br>(0.9) | 0.0<br>(0.0)        | 0.9<br>(0.1)           | 0           | 4.6<br>(0.6)        | 0.1<br>(0.1)        | 0.7<br>(0.1)           | 0       | <u>5.3</u><br>(0.9) | 0.0<br>(0.0)        | 0.9<br>(0.1)           |
| GGS_SU | 200   | 0           | 4.2<br>(0.6)        | 0.1<br>(0.1)        | 0.7<br>(0.1)           | 0       | 4.9<br>(0.8)        | 0.0<br>(0.1)        | 0.9<br>(0.1)           | 0           | 4.6<br>(0.6)        | 0.1<br>(0.1)        | 0.7<br>(0.1)           | 0       | 5.2<br>(0.8)        | 0.0<br>(0.0)        | 0.9<br>(0.1)           |
| GGS_SU | 100   | 0           | 4.0<br>(0.6)        | 0.2<br>(0.1)        | 0.7<br>(0.1)           | 1       | 4.8<br>(0.8)        | 0.0<br>(0.0)        | 0.9<br>(0.1)           | 0           | 4.3<br>(0.5)        | 0.1<br>(0.1)        | 0.7<br>(0.1)           | 0       | 5.0<br>(0.7)        | 0.0<br>(0.0)        | 0.9<br>(0.1)           |
| IGS_SU | 500   | 0           | 4.0<br>(0.5)        | 0.2<br>(0.1)        | 0.5<br>(0.1)           | 0       | 4.9<br>(0.7)        | 0.1<br>(0.1)        | 0.7<br>(0.0)           | 0           | 4.3<br>(0.5)        | 0.2<br>(0.1)        | 0.5<br>(0.1)           | 0       | 5.2<br>(0.8)        | 0.0<br>(0.0)        | 0.7<br>(0.1)           |
| IGS_SU | 200   | 0           | 3.9<br>(0.5)        | 0.2<br>(0.1)        | 0.5<br>(0.0)           | 0       | 4.8<br>(0.7)        | 0.1<br>(0.1)        | 0.7<br>(0.1)           | 0           | 4.3<br>(0.5)        | 0.2<br>(0.1)        | 0.5<br>(0.1)           | 0       | 5.2<br>(0.8)        | 0.1<br>(0.0)        | 0.7<br>(0.1)           |
| IGS_SU | 100   | 0           | 3.8<br>(0.5)        | 0.3<br>(0.1)        | 0.5<br>(0.1)           | 0       | 4.7<br>(0.8)        | 0.1<br>(0.1)        | 0.7<br>(0.0)           | 0           | 4.0<br>(0.5)        | 0.2<br>(0.1)        | 0.5<br>(0.0)           | 0       | 4.9<br>(0.7)        | 0.1<br>(0.1)        | 0.7<br>(0.1)           |

**Supplemental Table 5. Comparison of genetic gain across different selection schemes in 5 and 10 years, with the setting of 200 n and 100 QTLs**

Asterisks (\*) indicate a significant difference between selection schemes. The heritability of the target trait was set as  $h^2 = 0.3$  (a) and  $h^2 = 0.6$  (b). In GS-based schemes, the results when the number of markers was set as 500 were used for statistical tests. The P value was calculated by matched paired t test and adjusted using Bonferroni method. The values in brackets indicate genetic gain in 5 and 10 years. \*p < 0.05; \*\*p < 0.01; no, no significant difference.

**(a)  $h^2 = 0.3$**

|              | 5 year       |              |              |              |                |                |                 |
|--------------|--------------|--------------|--------------|--------------|----------------|----------------|-----------------|
|              | GPS<br>(2.9) | SPS<br>(3.1) | GGs<br>(3.6) | IGs<br>(3.0) | GGs_S<br>(4.0) | IGs_S<br>(3.7) | GGs_SU<br>(4.0) |
| SPS (3.1)    | **           | -            | -            | -            | -              | -              | -               |
| GGs (3.6)    | **           | **           | -            | -            | -              | -              | -               |
| IGs (3.0)    | no           | no           | **           | -            | -              | -              | -               |
| GGs_S (4.0)  | **           | **           | **           | **           | -              | -              | -               |
| IGs_S (3.7)  | **           | **           | no           | **           | **             | -              | -               |
| GGs_SU (4.0) | **           | **           | **           | **           | no             | **             | -               |
| IGs_SU (3.3) | **           | *            | **           | **           | **             | **             | **              |

|              | 10 year      |              |              |              |                |                |                 |
|--------------|--------------|--------------|--------------|--------------|----------------|----------------|-----------------|
|              | GPS<br>(4.0) | SPS<br>(3.9) | GGs<br>(4.8) | IGs<br>(4.1) | GGs_S<br>(4.7) | IGs_S<br>(4.6) | GGs_SU<br>(5.1) |
| SPS (3.9)    | no           | -            | -            | -            | -              | -              | -               |
| GGs (4.8)    | **           | **           | -            | -            | -              | -              | -               |
| IGs (4.1)    | no           | no           | **           | -            | -              | -              | -               |
| GGs_S (4.7)  | **           | **           | no           | **           | -              | -              | -               |
| IGs_S (4.6)  | **           | **           | no           | **           | no             | -              | -               |
| GGs_SU (5.1) | **           | **           | *            | **           | **             | **             | -               |
| IGs_SU (4.6) | **           | **           | no           | **           | no             | no             | **              |

**(b)  $h^2 = 0.6$**

|              | 5 year       |              |              |              |                |                |                 |
|--------------|--------------|--------------|--------------|--------------|----------------|----------------|-----------------|
|              | GPS<br>(3.6) | SPS<br>(3.8) | GGs<br>(4.0) | IGs<br>(3.4) | GGs_S<br>(4.7) | IGs_S<br>(4.3) | GGs_SU<br>(4.4) |
| SPS (3.8)    | **           | -            | -            | -            | -              | -              | -               |
| GGs (4.0)    | **           | **           | -            | -            | -              | -              | -               |
| IGs (3.4)    | **           | **           | **           | -            | -              | -              | -               |
| GGs_S (4.7)  | **           | **           | **           | **           | -              | -              | -               |
| IGs_S (4.3)  | **           | **           | **           | **           | **             | -              | -               |
| GGs_SU (4.4) | **           | **           | **           | **           | **             | *              | -               |
| IGs_SU (3.9) | **           | no           | no           | **           | **             | **             | **              |

|              | 10 year      |              |              |              |                |                |                 |
|--------------|--------------|--------------|--------------|--------------|----------------|----------------|-----------------|
|              | GPS<br>(4.9) | SPS<br>(4.7) | GGs<br>(5.3) | IGs<br>(4.7) | GGs_S<br>(5.6) | IGs_S<br>(5.4) | GGs_SU<br>(5.8) |
| SPS (4.7)    | no           | -            | -            | -            | -              | -              | -               |
| GGs (5.3)    | **           | **           | -            | -            | -              | -              | -               |
| IGs (4.7)    | *            | no           | **           | -            | -              | -              | -               |
| GGs_S (5.6)  | **           | **           | **           | **           | -              | -              | -               |
| IGs_S (5.4)  | **           | **           | no           | **           | no             | -              | -               |
| GGs_SU (5.8) | **           | **           | **           | **           | *              | **             | -               |
| IGs_SU (5.4) | **           | **           | no           | **           | no             | no             | **              |

**Supplemental Table 6. Comparison of genetic gain across different selection schemes in 5 and 10 years, with the setting of 200 n and 30 QTLs**

Asterisks (\*) indicate a significant difference between selection schemes. The heritability of the target trait was set as  $h^2 = 0.3$  (a) and  $h^2 = 0.6$  (b). In GS-based schemes, the results when the number of markers was set as 500 were used for statistical tests. The P value was calculated by matched paired t test and adjusted using Bonferroni method. The values in brackets indicate genetic gain in 5 and 10 years. \*p < 0.05; \*\*p < 0.01; no, no significant difference.

**(a)  $h^2 = 0.3$**

|              | 5 year       |              |              |              |                |                |                 |
|--------------|--------------|--------------|--------------|--------------|----------------|----------------|-----------------|
|              | GPS<br>(2.7) | SPS<br>(3.0) | GGs<br>(3.5) | IGs<br>(2.9) | GGs_S<br>(3.6) | IGs_S<br>(3.4) | GGs_SU<br>(3.6) |
| SPS (3.0)    | **           | -            | -            | -            | -              | -              | -               |
| GGs (3.5)    | **           | **           | -            | -            | -              | -              | -               |
| IGs (2.9)    | no           | no           | **           | -            | -              | -              | -               |
| GGs_S (3.6)  | **           | **           | no           | **           | -              | -              | -               |
| IGs_S (3.4)  | **           | **           | no           | **           | **             | -              | -               |
| GGs_SU (3.6) | **           | **           | no           | **           | no             | no             | -               |
| IGs_SU (3.2) | **           | **           | **           | **           | **             | **             | **              |

|              | 10 year      |              |              |              |                |                |                 |
|--------------|--------------|--------------|--------------|--------------|----------------|----------------|-----------------|
|              | GPS<br>(3.7) | SPS<br>(3.6) | GGs<br>(4.2) | IGs<br>(3.7) | GGs_S<br>(4.1) | IGs_S<br>(4.0) | GGs_SU<br>(4.3) |
| SPS (3.6)    | no           | -            | -            | -            | -              | -              | -               |
| GGs (4.2)    | **           | **           | -            | -            | -              | -              | -               |
| IGs (3.7)    | no           | no           | **           | -            | -              | -              | -               |
| GGs_S (4.1)  | **           | **           | no           | **           | -              | -              | -               |
| IGs_S (4.0)  | **           | **           | *            | **           | no             | -              | -               |
| GGs_SU (4.3) | **           | **           | no           | **           | no             | **             | -               |
| IGs_SU (4.1) | **           | **           | no           | **           | no             | no             | no              |

**(b)  $h^2 = 0.6$**

|              | 5 year       |              |              |              |                |                |                 |
|--------------|--------------|--------------|--------------|--------------|----------------|----------------|-----------------|
|              | GPS<br>(3.4) | SPS<br>(3.5) | GGs<br>(3.8) | IGs<br>(3.3) | GGs_S<br>(4.2) | IGs_S<br>(3.9) | GGs_SU<br>(4.1) |
| SPS (3.5)    | no           | -            | -            | -            | -              | -              | -               |
| GGs (3.8)    | **           | **           | -            | -            | -              | -              | -               |
| IGs (3.3)    | **           | **           | **           | -            | -              | -              | -               |
| GGs_S (4.2)  | **           | **           | **           | **           | -              | -              | -               |
| IGs_S (3.9)  | **           | **           | **           | **           | **             | -              | -               |
| GGs_SU (4.1) | **           | **           | **           | **           | *              | *              | -               |
| IGs_SU (3.7) | **           | no           | no           | **           | **             | **             | **              |

|              | 10 year      |              |              |              |                |                |                 |
|--------------|--------------|--------------|--------------|--------------|----------------|----------------|-----------------|
|              | GPS<br>(4.4) | SPS<br>(4.2) | GGs<br>(4.6) | IGs<br>(4.2) | GGs_S<br>(4.7) | IGs_S<br>(4.7) | GGs_SU<br>(4.9) |
| SPS (4.2)    | *            | -            | -            | -            | -              | -              | -               |
| GGs (4.6)    | **           | **           | -            | -            | -              | -              | -               |
| IGs (4.2)    | **           | no           | **           | -            | -              | -              | -               |
| GGs_S (4.7)  | **           | **           | no           | **           | -              | -              | -               |
| IGs_S (4.7)  | **           | **           | no           | **           | no             | -              | -               |
| GGs_SU (4.9) | **           | **           | **           | **           | *              | **             | -               |
| IGs_SU (4.7) | **           | **           | no           | **           | no             | no             | **              |

**Supplemental Table 7. Comparison of genetic gain across different selection schemes in 5 and 10 years, with the setting of 500 n and 100 QTLs**

Asterisks (\*) indicate a significant difference between selection schemes. The heritability of the target trait was set as  $h^2 = 0.3$  (a) and  $h^2 = 0.6$  (b). In GS-based schemes, the results when the number of markers was set as 500 were used for statistical tests. The P value was calculated by matched paired t test and adjusted using Bonferroni method. The values in brackets indicate genetic gain in 5 and 10 years. \*p < 0.05; \*\*p < 0.01; no, no significant difference.

**(a)  $h^2 = 0.3$**

|              | 5 year       |              |              |              |                |                |                 |
|--------------|--------------|--------------|--------------|--------------|----------------|----------------|-----------------|
|              | GPS<br>(3.1) | SPS<br>(3.4) | GGG<br>(4.3) | IGS<br>(3.8) | GGG_S<br>(4.9) | IGG_S<br>(4.6) | GGG_SU<br>(4.7) |
| SPS (3.4)    | **           | -            | -            | -            | -              | -              | -               |
| GGG (4.3)    | **           | **           | -            | -            | -              | -              | -               |
| IGS (3.8)    | **           | **           | **           | -            | -              | -              | -               |
| GGG_S (4.9)  | **           | **           | **           | **           | -              | -              | -               |
| IGG_S (4.6)  | **           | **           | **           | **           | **             | -              | -               |
| GGG_SU (4.7) | **           | **           | **           | **           | **             | no             | -               |
| IGG_SU (4.3) | **           | **           | no           | **           | **             | **             | **              |

|              | 10 year      |              |              |              |                |                |                 |
|--------------|--------------|--------------|--------------|--------------|----------------|----------------|-----------------|
|              | GPS<br>(4.4) | SPS<br>(4.2) | GGG<br>(5.5) | IGS<br>(5.0) | GGG_S<br>(5.7) | IGG_S<br>(5.6) | GGG_SU<br>(5.9) |
| SPS (4.2)    | no           | -            | -            | -            | -              | -              | -               |
| GGG (5.5)    | **           | **           | -            | -            | -              | -              | -               |
| IGS (5.0)    | **           | **           | **           | -            | -              | -              | -               |
| GGG_S (5.7)  | **           | **           | no           | **           | -              | -              | -               |
| IGG_S (5.6)  | **           | **           | no           | **           | no             | -              | -               |
| GGG_SU (5.9) | **           | **           | **           | **           | *              | **             | -               |
| IGG_SU (5.7) | **           | **           | no           | **           | no             | no             | **              |

**(b)  $h^2 = 0.6$**

|              | 5 year       |              |              |              |                |                |                 |
|--------------|--------------|--------------|--------------|--------------|----------------|----------------|-----------------|
|              | GPS<br>(4.1) | SPS<br>(4.2) | GGG<br>(4.7) | IGS<br>(4.2) | GGG_S<br>(5.6) | IGG_S<br>(5.4) | GGG_SU<br>(5.3) |
| SPS (4.2)    | *            | -            | -            | -            | -              | -              | -               |
| GGG (4.7)    | **           | **           | -            | -            | -              | -              | -               |
| IGS (4.2)    | no           | no           | **           | -            | -              | -              | -               |
| GGG_S (5.6)  | **           | **           | **           | **           | -              | -              | -               |
| IGG_S (5.4)  | **           | **           | **           | **           | **             | -              | -               |
| GGG_SU (5.3) | **           | **           | **           | **           | **             | no             | -               |
| IGG_SU (4.9) | **           | **           | **           | **           | **             | **             | **              |

|              | 10 year      |              |              |              |                |                |                 |
|--------------|--------------|--------------|--------------|--------------|----------------|----------------|-----------------|
|              | GPS<br>(5.4) | SPS<br>(5.1) | GGG<br>(6.1) | IGS<br>(5.7) | GGG_S<br>(6.5) | IGG_S<br>(6.6) | GGG_SU<br>(6.7) |
| SPS (5.1)    | **           | -            | -            | -            | -              | -              | -               |
| GGG (6.1)    | **           | **           | -            | -            | -              | -              | -               |
| IGS (5.7)    | **           | **           | **           | -            | -              | -              | -               |
| GGG_S (6.5)  | **           | **           | **           | **           | -              | -              | -               |
| IGG_S (6.6)  | **           | **           | **           | **           | no             | -              | -               |
| GGG_SU (6.7) | **           | **           | **           | **           | no             | no             | -               |
| IGG_SU (6.5) | **           | **           | **           | **           | no             | no             | no              |

**Supplemental Table 8. Comparison of genetic gain across different selection schemes in 5 and 10 years, with the setting of 500 n and 30 QTLs**

Asterisks (\*) indicate a significant difference between selection schemes. The heritability of the target trait was set as  $h^2 = 0.3$  (a) and  $h^2 = 0.6$  (b). In GS-based schemes, the results when the number of markers was set as 500 were used for statistical tests. The P value was calculated by matched paired t test and adjusted using Bonferroni method. The values in brackets indicate genetic gain in 5 and 10 years. \*p < 0.05; \*\*p < 0.01; no, no significant difference.

**(a)  $h^2 = 0.3$**

|              | 5 year       |              |              |              |                |                |                 |
|--------------|--------------|--------------|--------------|--------------|----------------|----------------|-----------------|
|              | GPS<br>(3.0) | SPS<br>(3.3) | GGs<br>(4.1) | IGs<br>(3.6) | GGs_S<br>(4.4) | IGs_S<br>(4.3) | GGs_SU<br>(4.3) |
| SPS (3.3)    | **           | -            | -            | -            | -              | -              | -               |
| GGs (4.1)    | **           | **           | -            | -            | -              | -              | -               |
| IGs (3.6)    | **           | **           | **           | -            | -              | -              | -               |
| GGs_S (4.4)  | **           | **           | **           | **           | -              | -              | -               |
| IGs_S (4.3)  | **           | **           | **           | **           | no             | -              | -               |
| GGs_SU (4.3) | **           | **           | **           | **           | no             | no             | -               |
| IGs_SU (4.0) | **           | **           | no           | **           | **             | **             | **              |

|              | 10 year      |              |              |              |                |                |                 |
|--------------|--------------|--------------|--------------|--------------|----------------|----------------|-----------------|
|              | GPS<br>(4.1) | SPS<br>(4.1) | GGs<br>(4.8) | IGs<br>(4.6) | GGs_S<br>(4.8) | IGs_S<br>(4.9) | GGs_SU<br>(5.0) |
| SPS (4.1)    | no           | -            | -            | -            | -              | -              | -               |
| GGs (4.8)    | **           | **           | -            | -            | -              | -              | -               |
| IGs (4.6)    | **           | **           | **           | -            | -              | -              | -               |
| GGs_S (4.8)  | **           | **           | no           | **           | -              | -              | -               |
| IGs_S (4.9)  | **           | **           | no           | **           | no             | -              | -               |
| GGs_SU (5.0) | **           | **           | **           | **           | *              | *              | -               |
| IGs_SU (4.9) | **           | **           | no           | **           | no             | no             | no              |

**(b)  $h^2 = 0.6$**

|              | 5 year       |              |              |              |                |                |                 |
|--------------|--------------|--------------|--------------|--------------|----------------|----------------|-----------------|
|              | GPS<br>(3.8) | SPS<br>(3.9) | GGs<br>(4.3) | IGs<br>(3.9) | GGs_S<br>(4.7) | IGs_S<br>(4.6) | GGs_SU<br>(4.6) |
| SPS (3.9)    | **           | -            | -            | -            | -              | -              | -               |
| GGs (4.3)    | **           | **           | -            | -            | -              | -              | -               |
| IGs (3.9)    | **           | no           | **           | -            | -              | -              | -               |
| GGs_S (4.7)  | **           | **           | **           | **           | -              | -              | -               |
| IGs_S (4.6)  | **           | **           | **           | **           | **             | -              | -               |
| GGs_SU (4.6) | **           | **           | **           | **           | no             | no             | -               |
| IGs_SU (4.3) | **           | **           | no           | **           | **             | **             | **              |

|              | 10 year      |              |              |              |                |                |                 |
|--------------|--------------|--------------|--------------|--------------|----------------|----------------|-----------------|
|              | GPS<br>(4.7) | SPS<br>(4.5) | GGs<br>(5.1) | IGs<br>(4.9) | GGs_S<br>(5.0) | IGs_S<br>(5.1) | GGs_SU<br>(5.3) |
| SPS (4.5)    | **           | -            | -            | -            | -              | -              | -               |
| GGs (5.1)    | **           | **           | -            | -            | -              | -              | -               |
| IGs (4.9)    | *            | **           | **           | -            | -              | -              | -               |
| GGs_S (5.0)  | **           | **           | no           | **           | -              | -              | -               |
| IGs_S (5.1)  | **           | **           | no           | **           | no             | -              | -               |
| GGs_SU (5.3) | **           | **           | **           | **           | **             | **             | -               |
| IGs_SU (5.2) | **           | **           | no           | **           | no             | no             | **              |
